# Supplementary material
Source: Royal Society of Chemistry journal article supplement (doi:10.1039/d6ta00580b)
Supplement: d6ta00580b1.pdf [file d6ta00580b1.pdf]

## **Highly Reflective Eco-Friendly NIR Cool Pigments: Properties and Energy-Saving in Reflective Cooling**

*Yan Zang, Qishuang Cai, Zhengjin Bao, Minmin Gao, Jie Liu\**

Chinese Education Ministry Key Laboratory and Joint International Research Laboratory of Resource Chemistry, Shanghai Key Laboratory of Rare Earth Functional Materials, College of Chemistry and Materials Science, Shanghai Normal University, Shanghai 200234, China

E-mail: liujie@shnu.edu.cn

## 1. Supplementary Figures

**Supplementary Figure. S1.** The near-infrared reflection spectrum of the coating.

**Supplementary Figure.S2.** The near-infrared solar reflectance spectrum of the coating.

**Supplementary Figure.S3.** Building model.

**Supplementary Figure.S4.** Predicted total cooling energy savings after expansion of all buildings.

**Supplementary Figure S5.** Predicted annual HVAC (heating and cooling) energy consumption simulation results after expansion of all buildings.

## 2. Supplementary Tables.

**Supplementary Table S1.** Unit cell parameters of synthesized pigment samples.

**Supplementary Table S2.** Color coordinates, absorption edges, and band gaps of  $\text{KREW}_2\text{O}_8$  (RE=Ce, Nd, Gd, Y, Er) pigment samples.

**Supplementary Table S3.** Near-infrared reflectance and near-infrared solar reflectance of  $\text{KREW}_2\text{O}_8$ (RE=Ce, Nd, Gd, Y, Er) pigment samples.

**Supplementary Table S4.** Simulated temperatures and temperature differences of  $\text{KREW}_2\text{O}_8$  (RE=Ce, Nd, Gd, Y, Er) pigment samples.

**Supplementary Table S5.** Near-infrared reflectance and near-infrared solar reflectance of  $\text{KREW}_2\text{O}_8$ (RE=Ce, Nd, Gd, Y, Er) Coating samples.

Supplementary Figures and Tables.

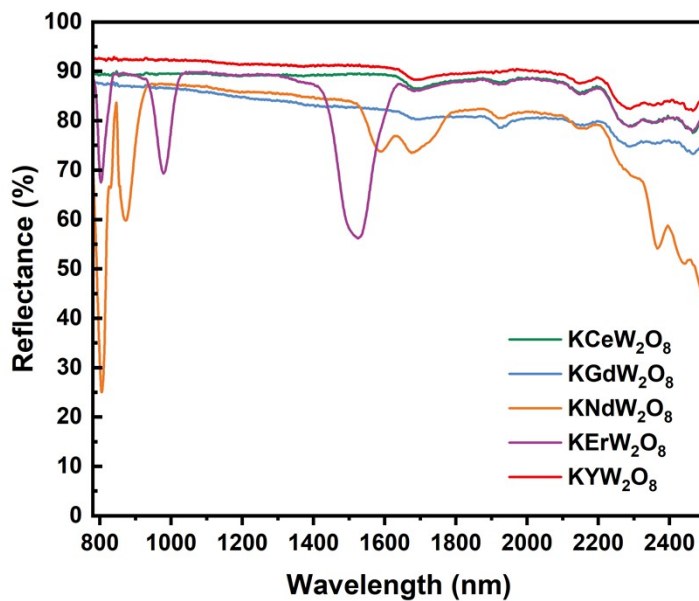

Figure. S1. The near-infrared reflection spectrum of the coating.

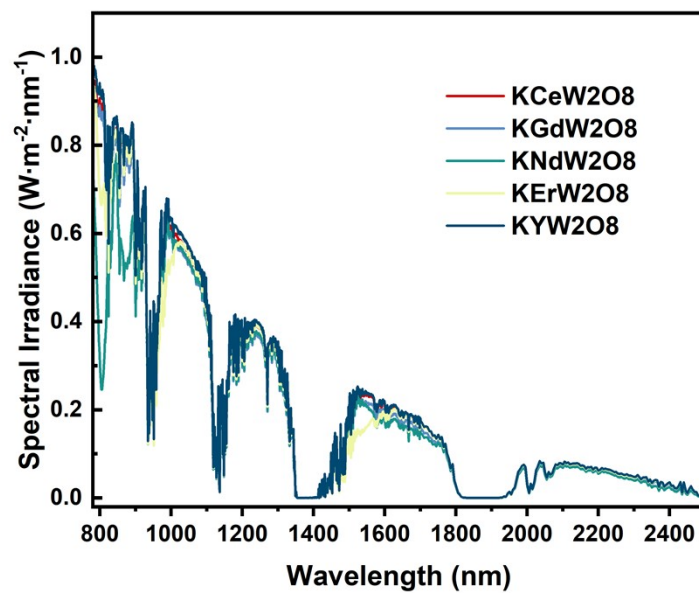

Figure.S2. The near-infrared solar reflectance spectrum of the coating.

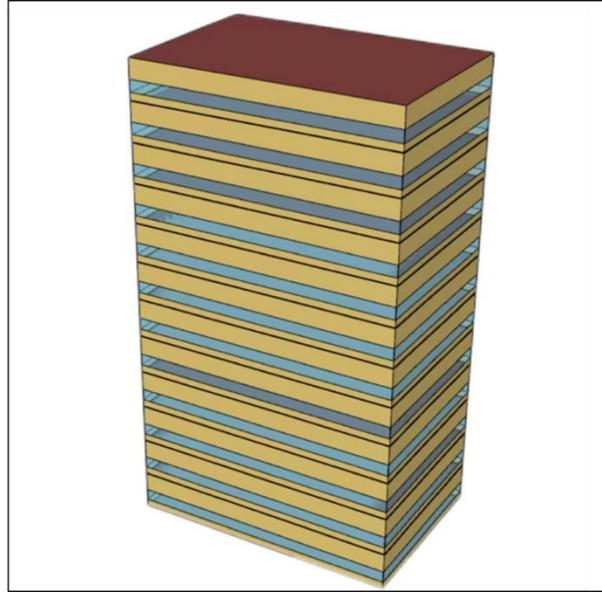

**Figure.S3.** Building model.

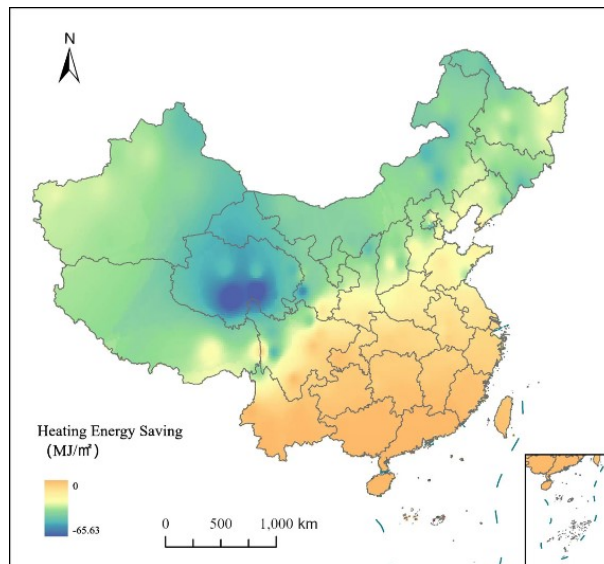

**Figure.S4.** Predicted total cooling energy savings after expansion of all buildings.

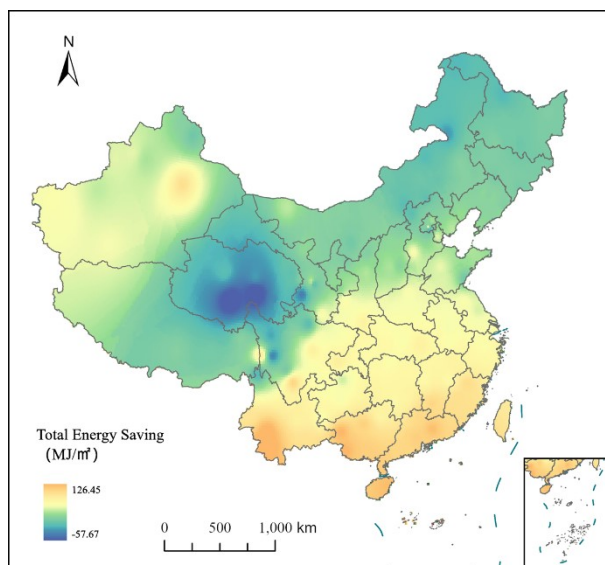

**Figure S5.** Predicted annual HVAC (heating and cooling) energy consumption simulation results after expansion of all buildings.

**Table S1.** Unit cell parameters of synthesized pigment samples.

| Sample                | NaCeW <sub>2</sub> O <sub>8</sub> | KNdW <sub>2</sub> O <sub>8</sub> | KGdW <sub>2</sub> O <sub>8</sub> | KErW <sub>2</sub> O <sub>8</sub> |
|-----------------------|-----------------------------------|----------------------------------|----------------------------------|----------------------------------|
| Space group           | I41/a                             | C2/m                             | C2/c                             | C2/c                             |
| a/Å                   | 5.43                              | 10.16                            | 10.69                            | 10.63                            |
| b/Å                   | 5.43                              | 10.77                            | 10.45                            | 10.32                            |
| c/Å                   | 12.09                             | 7.49                             | 7.61                             | 7.54                             |
| Volume/Å <sup>3</sup> | 355.90                            | 663.51                           | 643.65                           | 627.07                           |
| 2θ range/degree       | 10-80                             | 10-80                            | 10-80                            | 10-80                            |
| R <sub>wp</sub>       | 9.23%                             | 9.54%                            | 11.72%                           | 10.15%                           |
| R <sub>p</sub>        | 5.87%                             | 6.91%                            | 8.05%                            | 7.25%                            |
| χ <sup>2</sup>        | 0.83                              | 0.50                             | 1.20                             | 1.12                             |

**Table S2.** Color coordinates, absorption edges, and band gaps of  $\text{KREW}_2\text{O}_8$  (RE=Ce, Nd, Gd, Y, Er) pigment samples.

| Sample                    | L*    | a*    | b*     | c*    | Absorption edge (nm) | Eg (eV) |
|---------------------------|-------|-------|--------|-------|----------------------|---------|
| $\text{KCeW}_2\text{O}_8$ | 99.75 | 1.24  | -4.76  | 4.92  | 396                  | 3.13    |
| $\text{KNdW}_2\text{O}_8$ | 93.77 | 16.20 | -29.06 | 33.27 | -                    | -       |
| $\text{KGdW}_2\text{O}_8$ | 99.37 | 1.24  | -4.75  | 4.91  | 473                  | 2.62    |
| $\text{KYW}_2\text{O}_8$  | 99.42 | 1.24  | -4.75  | 24.86 | 543                  | 2.28    |
| $\text{KErW}_2\text{O}_8$ | 96.47 | 23.95 | 6.68   | 4.91  | -                    | -       |

**Table S3.** Near-infrared reflectance and near-infrared solar reflectance of  $\text{KREW}_2\text{O}_8$ (RE=Ce, Nd, Gd, Y, Er) and  $\text{TiO}_2$  pigment samples.

| Sample                    | R      | R*     |
|---------------------------|--------|--------|
| $\text{TiO}_2$            | 79.81% | 82.76% |
| $\text{KCeW}_2\text{O}_8$ | 94.15% | 93.95% |
| $\text{KNdW}_2\text{O}_8$ | 86.41% | 80.38% |
| $\text{KGdW}_2\text{O}_8$ | 89.61% | 90.69% |
| $\text{KErW}_2\text{O}_8$ | 89.56% | 88.91% |
| $\text{KYW}_2\text{O}_8$  | 93.66% | 94.09% |

**Table S4.** Simulated temperatures and temperature differences of  $\text{KREW}_2\text{O}_8$  (RE=Ce, Nd, Gd, Y, Er) Coating samples.

| Samples                   | 0 min ( $^{\circ}\text{C}$ ) | 10 min ( $^{\circ}\text{C}$ ) | $\Delta\text{T1}$ ( $^{\circ}\text{C}$ ) | $\Delta\text{T2}$ ( $^{\circ}\text{C}$ ) |
|---------------------------|------------------------------|-------------------------------|------------------------------------------|------------------------------------------|
| acrylic resinz NO.1       | 25.0                         | 41.1                          | 16.1                                     | 0                                        |
| $\text{TiO}_2$            | 25.1                         | 35.5                          | 10.4                                     | 5.7                                      |
| $\text{KCeW}_2\text{O}_8$ | 25.8                         | 30.4                          | 4.6                                      | 11.5                                     |
| acrylic resinz NO.2       | 25.9                         | 43.8                          | 17.9                                     | 0                                        |
| $\text{KNdW}_2\text{O}_8$ | 25.4                         | 34.8                          | 9.4                                      | 8.5                                      |
| $\text{KGdW}_2\text{O}_8$ | 24.9                         | 33.5                          | 8.6                                      | 9.3                                      |
| $\text{KErW}_2\text{O}_8$ | 25.2                         | 34.2                          | 9.0                                      | 8.9                                      |
| $\text{KYW}_2\text{O}_8$  | 25.0                         | 32.4                          | 7.4                                      | 10.5                                     |

**Table S5.** Near-infrared reflectance and near-infrared solar reflectance of  $\text{KREW}_2\text{O}_8$  (RE=Ce, Nd, Gd, Y, Er) Coating samples.

| Sample                    | R      | $\text{R}^*$ |
|---------------------------|--------|--------------|
| $\text{KCeW}_2\text{O}_8$ | 87.32% | 89.07%       |
| $\text{KNdW}_2\text{O}_8$ | 77.25% | 76.78%       |
| $\text{KGdW}_2\text{O}_8$ | 81.80% | 85.09%       |
| $\text{KYW}_2\text{O}_8$  | 89.56% | 91.60%       |
| $\text{KErW}_2\text{O}_8$ | 84.02% | 84.38%       |
